# Supplementary material for: Contribution of chronic diseases to the disability burden in a population 15 years and older, Belgium, 1997–2008
Source: Springer Nature journal article supplement (doi:10.1186/s12889-015-1574-z), 2015-03-06

# Men

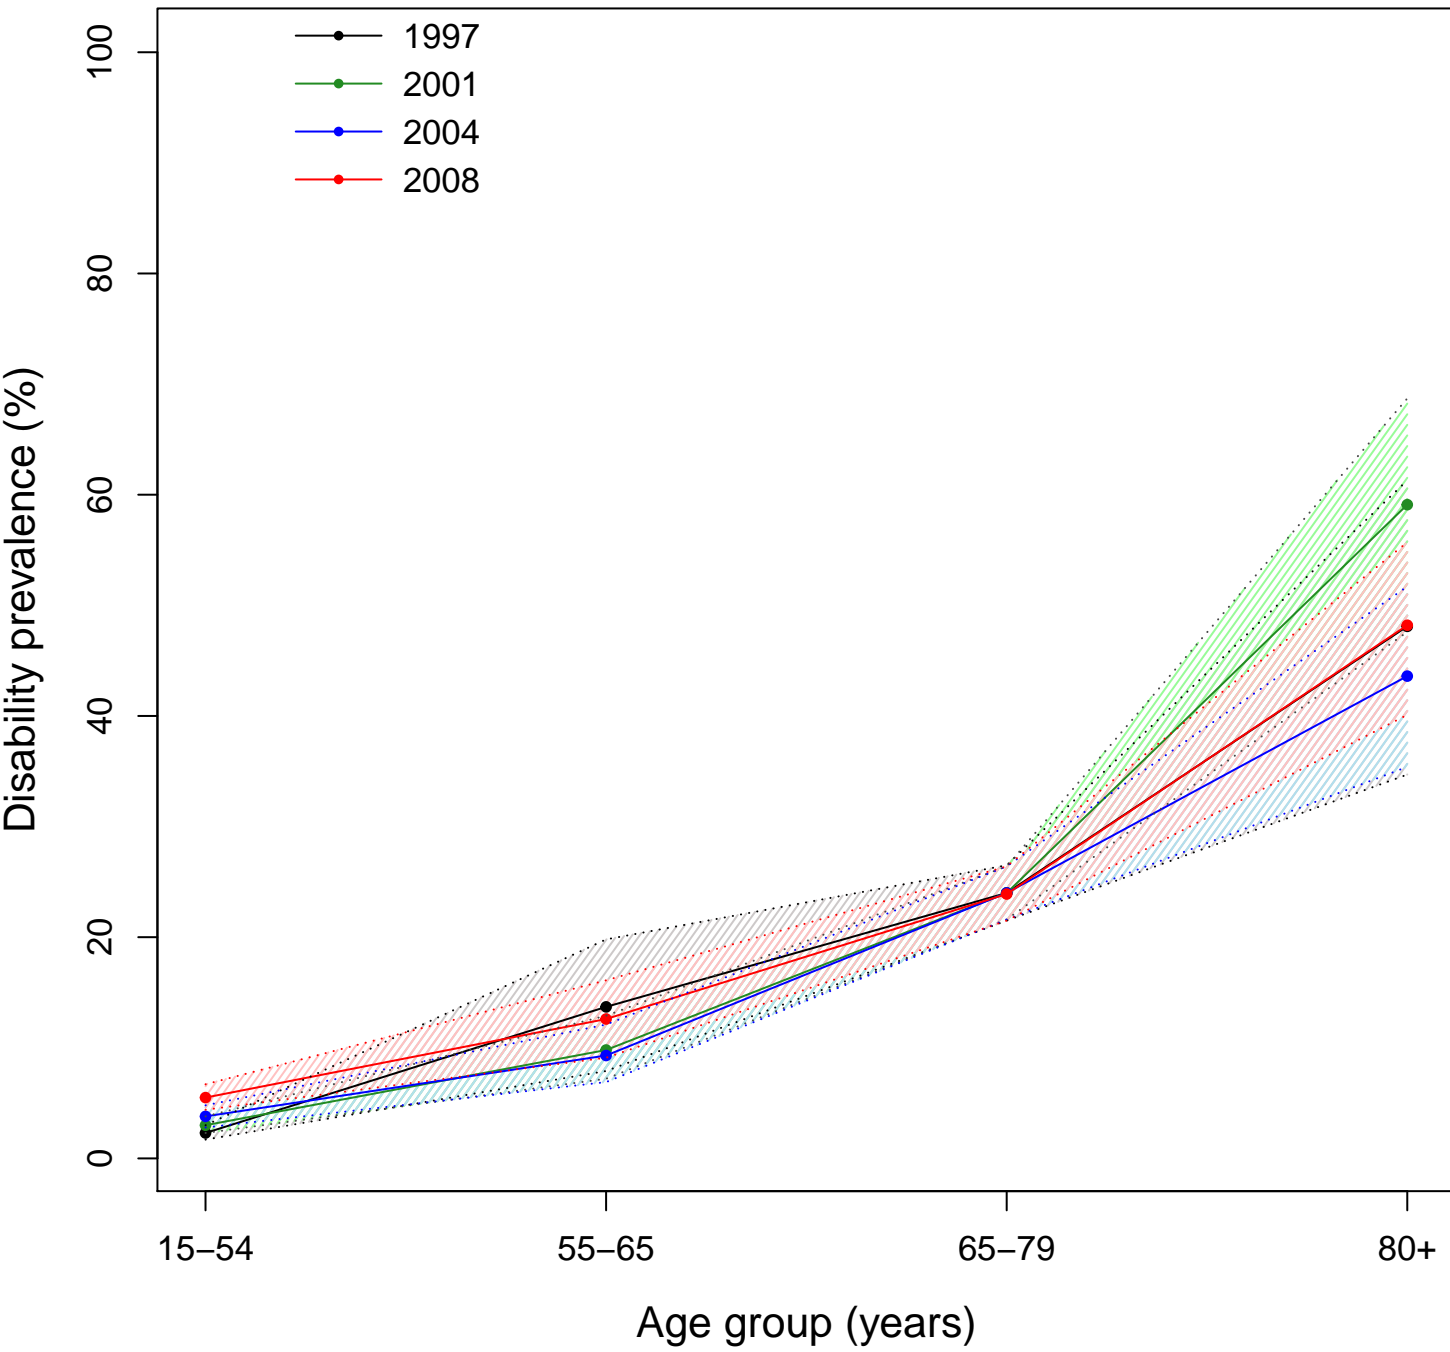

# Women

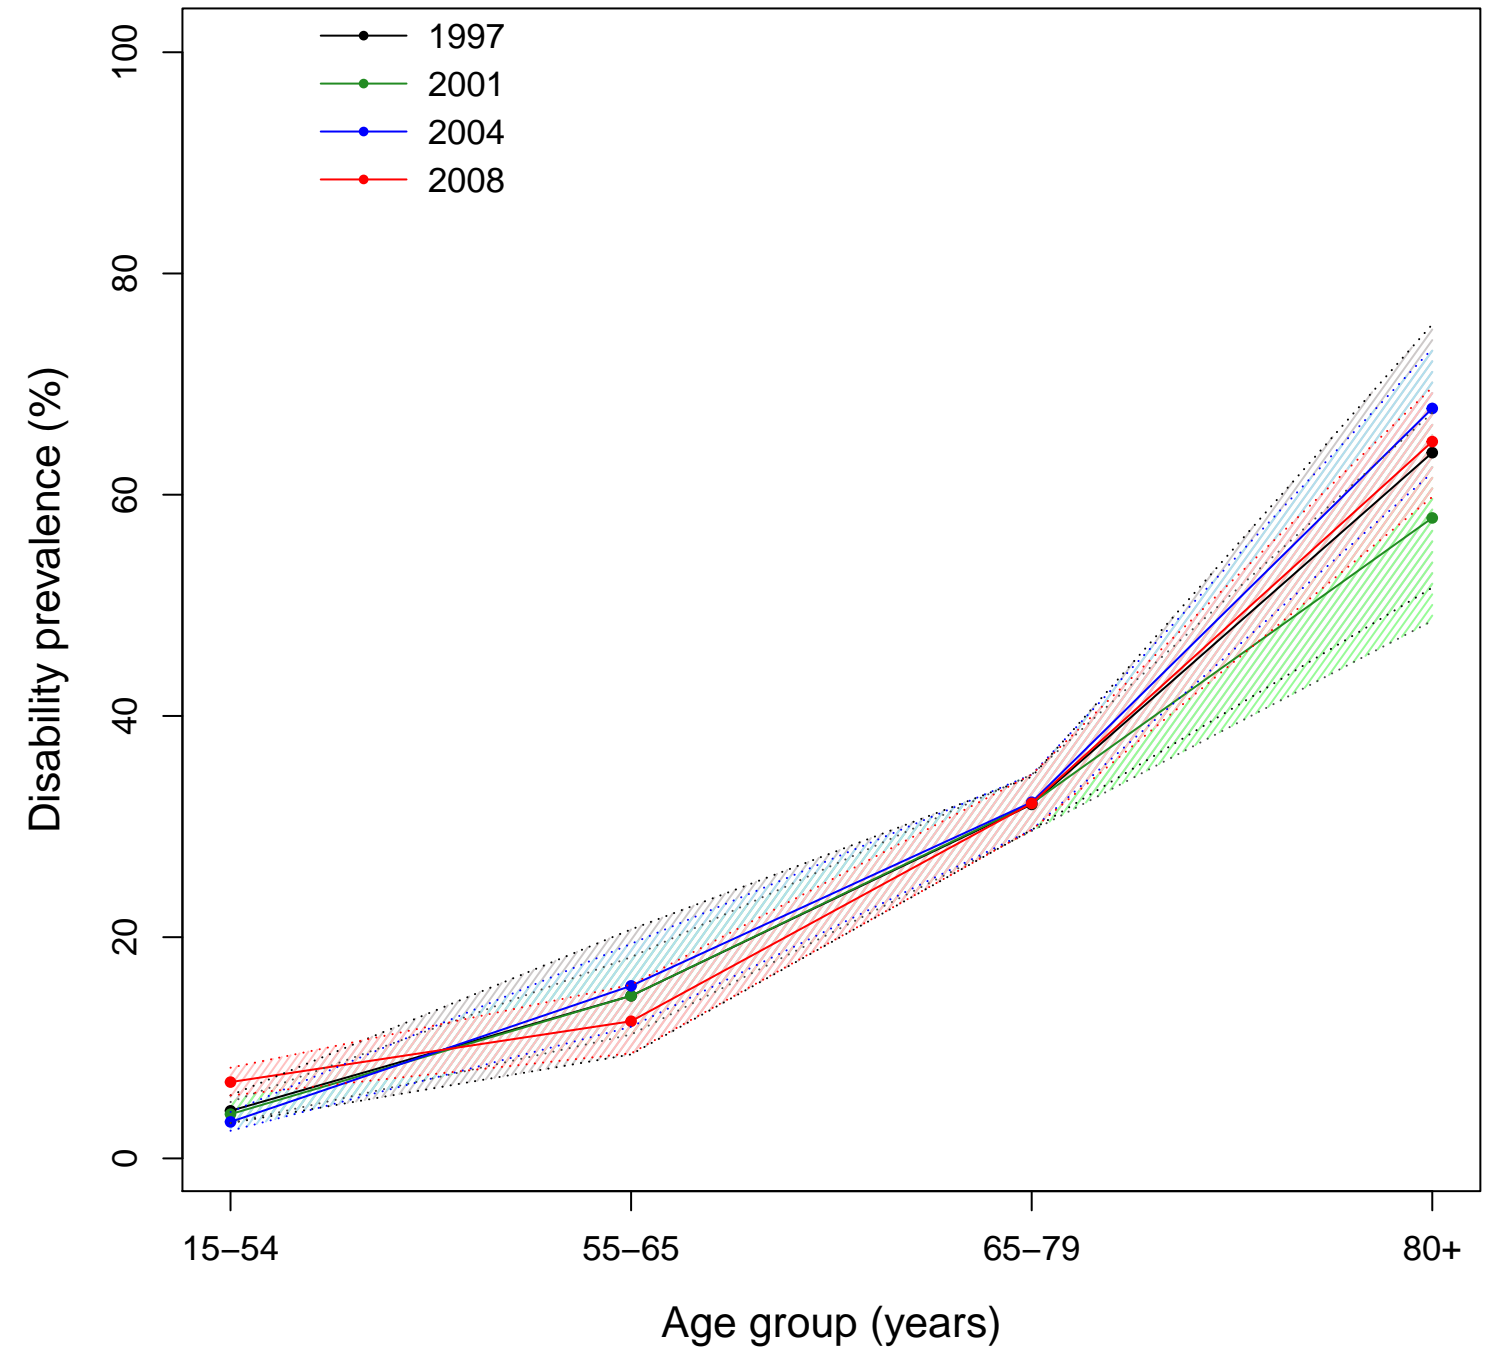

Supplement: MOESM3 [file 9748974]
